# Supplementary material for: Interface-suppressed high-quality symmetrical bifacial flexible CZTSe solar cells through a green electrodeposition process
Source: Royal Society of Chemistry journal article supplement (doi:10.1039/d3ta03411a), 2023-01-01
Supplement: d3ta03411a1.pdf [file d3ta03411a1.pdf]

## **Electronic Supplementary Information**

### **Interface Suppressed High-Quality Symmetrical Bifacial Flexible CZTSe Solar Cells through a Green Electrodeposition Process**

Jingling Liu,<sup>a</sup> Hang Cai,<sup>a</sup> Xinyu Wu,<sup>a</sup> Sheng Liu,<sup>a</sup> Ying Xue,<sup>a</sup> Xinsheng Liu,<sup>a</sup> Ke Cheng<sup>\*a</sup>  
and Zuliang Du<sup>\*a</sup>

<sup>a</sup> Key Laboratory for Special Functional Materials of Ministry of Education, National & Local Joint Engineering Research Center for High-efficiency Display and Lighting Technology, School of Materials Science and Engineering, and Collaborative Innovation Center of Nano Functional Materials and Applications, Henan University, Kaifeng 475004, China

#### **Corresponding Author**

\*[zld@henu.edu.cn](mailto:zld@henu.edu.cn), [ck@henu.edu.cn](mailto:ck@henu.edu.cn)

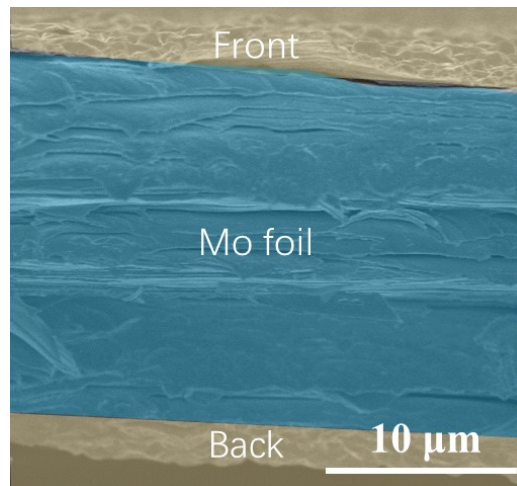

**Figure S1.** Cross-section SEM image of bifacial flexible Cu/Sn/Zn preformed layers.

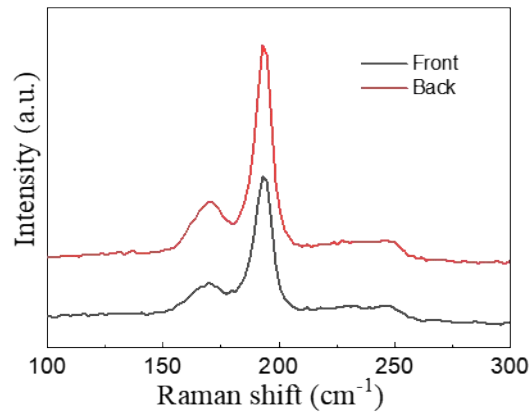

**Figure S2.** Raman spectra for bifacial flexible CZTSe thin films.

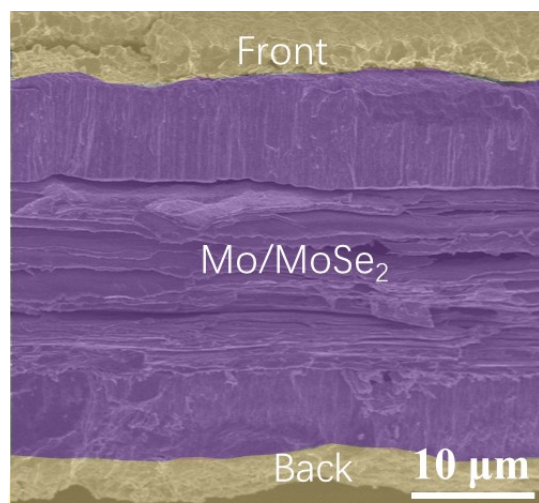

**Figure S3.** Cross-section SEM image of bifacial flexible CZTSe devices.

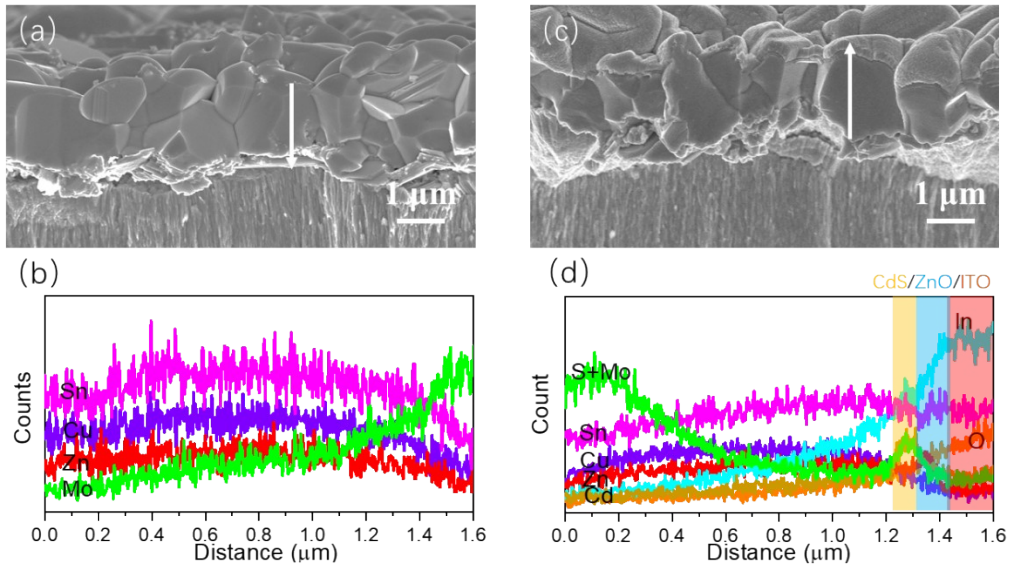

**Figure S4.** (a and b) cross-sectional SEM images and EDS line scanning profiles along the white lines for the absorber layer and devices, respectively (a and b for the absorber layer; c and d for the device).

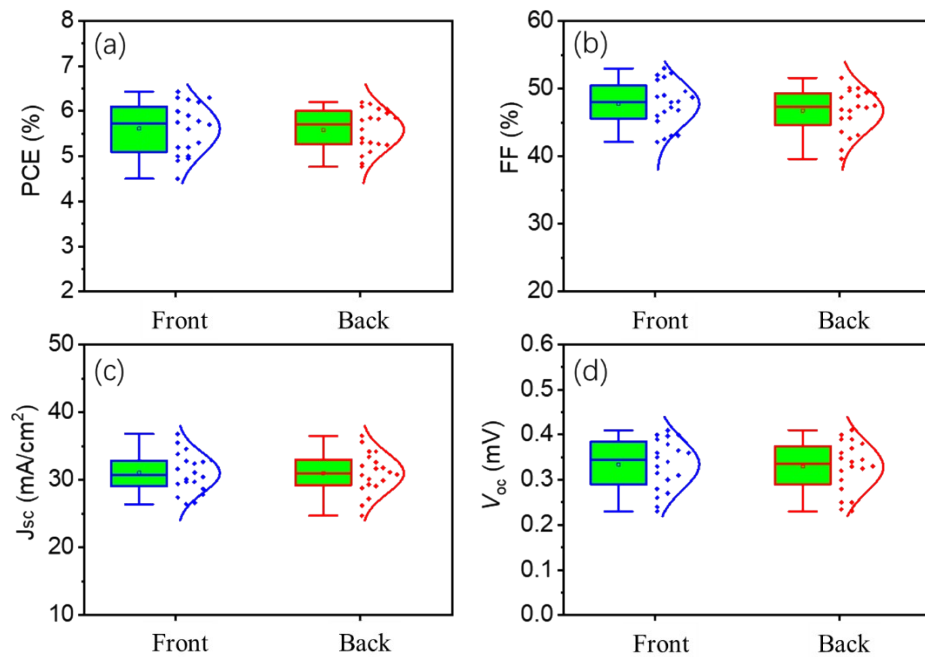

**Figure S5.** Statistical distribution of PCE, FF,  $J_{sc}$  and  $V_{oc}$  for bifacial flexible CZTSe solar cells.

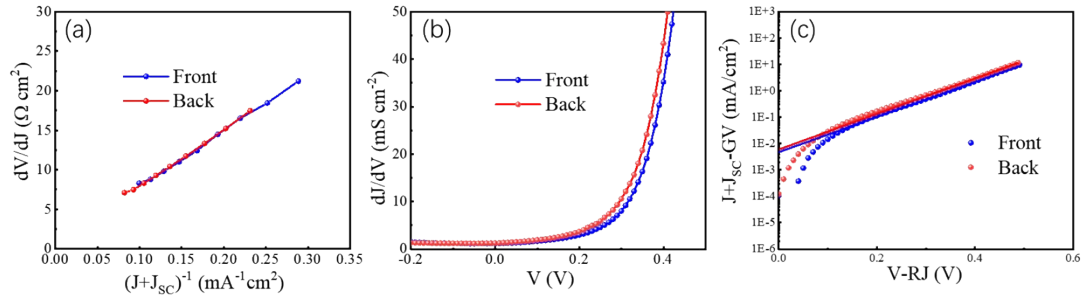

**Figure S6.** (a) The Plots of  $dV/dJ$  versus  $(J+J_{sc})^{-1}$ ,  $dJ/dV$  vs  $V$ , and  $J+J_{sc}-GV$  vs  $V-R_sJ$ ,

respectively, for the bifacial flexible CZTSe solar cells extracted from dark  $J-V$ .

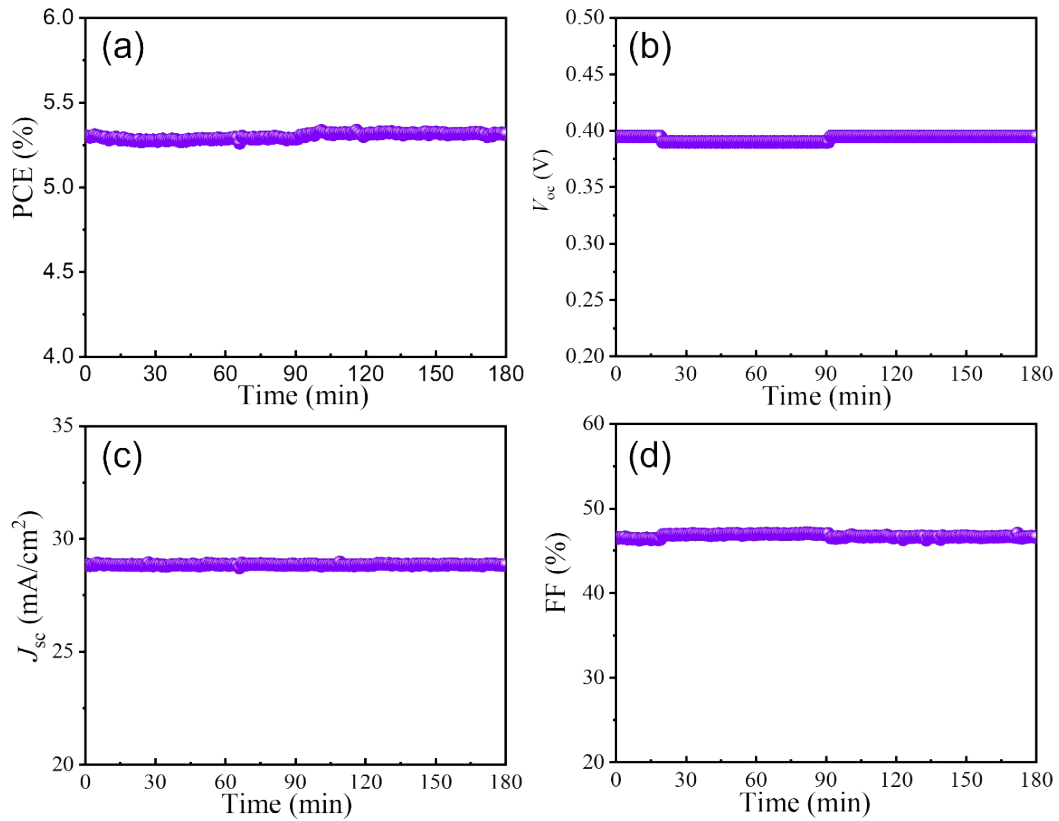

**Figure S7.** (a-d) The variations of PCE,  $V_{oc}$ ,  $J_{sc}$ , and FF for continuously irradiation for

3h.

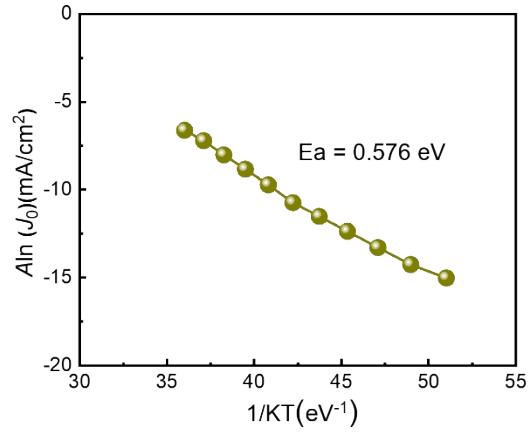

**Figure S8.**  $A \ln(J_0)$  vs.  $1/KT$  plot of CZTSe device extracted from J-V-T curve in Figure 5f.
